# Supplementary material
Source: Springer Nature journal article supplement (https://www.springermedizin.de/resource/supplementary/12958_2009_642_MOESM4_ESM.pdf/9568486)

**1****2****3****4****5****170KDa****120KDa****50KDa**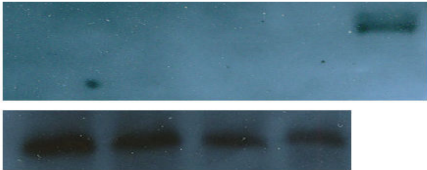

Supplement: MOESM4 [file 9568486]
